# Supplementary material for: Deciphering Precise Gene Transcriptional Expression Using gwINTACT in Tomato
Source: Frontiers journal article supplement (doi:10.3389/fpls.2022.852206), 2022-04-14
Supplement: Data_Sheet_1.zip [file Supplentary TableS1.xlsx]

## Sheet: A
The primers used for NTF plasmids construction
Gene	Primer	Primer sequence (5'-3')
eGFP	For	cgggggactctagaggatccgccaccatggtgagcaagggcg
	Rev	ggcagcggccgcagctccggacttgtacagctcgtccatgc
SlWIP2	For	tccggagctgcggccgctgccatggacttggaagaacaaaatac
	Rev	gatcggggaaattcgagctcttaggtgggtacaagttcagc
mas	For	caaacactgatagtttaaactgtcaaacactgatagtttaaac
	Rev	ctcaccatggtggcggatcctacaggacgtaacatggatc
BLRP	For	cgggggactctagaggatccatggctggtggacttaacgatatc
	Rev	ggcagcggccgcagctccggaagatccaccagtatcctcatgcc
BirA	For	cgggggactctagaggatcctgaaggataacaccgtgccattg
	Rev	gatcggggaaattcgagctctcagagatcctcctcactgatgag
The primers used for subcellular localization vectors
Gene	Primer	Primer sequence (5'-3')
eGFP	35s-eGFP-F	ggactctagaggatccgccaccatggtgagcaagg
	35s-eGFP-R	gatcggggaaattcgagctccttgtacagctcgtccatgcc
	mas-eGFP-F	agtctagaggatccgccaccatggtgagcaagggcgag
	mas-eGFP-R	gatcggggaaattcgagctccttgtacagctcgtccatgcc

## Sheet: B
The primers used for expression level identification
Gene	Primer	Primer sequence (5'-3')
Actin	For	cagcagatgtggatctcaaa
	Rev	ctgtggacaatggaaggac
WIP2	For	gctcttgctagtgaaattcag
	Rev	atggcttcaagttcagtaactc
BirA	For	actcatcatcggagataaggag
	Rev	gagttttccaccgagatcc
fabF	For	TGAGGAAGTTGACTGTTTGA
	Rev	GTACATAGTGGAGATGCCAG
fabG	For	TTCAGTGCTTTTCTTCAGTG
	Rev	GAATCGGAGGTGGAATTGAT
ACO3	For	AGCGTGATGCACAGAGTGAT
	Rev	CGAATTTCGGATAAACTTGCTTGC
ACO6	For	ATCAACCTCGGTGACCAACTC
	Rev	TCCATCAGGCTGAGCAATCA
ACO4	For	ATGGCTCAAAGGGTCCAACT
	Rev	GGCCTTTGATCAAGTCTGGC
SAM1	For	CCCATCTGGCCGATTCGTTA
	Rev	GAGCACCCCAACCACCATAA
SAM3	For	CGCAGAACCACTCTCTGTGT
	Rev	CCAGGCCTGAAGTCGAAGTT
ACS12	For	ACGTCATCGCCGAACCTATC
	Rev	AACGGAACCACGAGTTGACA
ACS6	For	GAGCCAGGTTGGTTTAGGGT
	Rev	TGTTGCAACTTCAACTCCCT
ACS10	For	TGAAAGTGGCTGTGGGAGAA
	Rev	GAGTTGCACCACCGGTAAGA
ACO1	For	AAACAGACGGGACACGAATG
	Rev	AACACAAACTTTGGATACACTTG
ERF1a	For	GGGTCCTTGGTCTCTACTCA
	Rev	ACAGCAGCTGGAGATAATCC
SlERF_E_2	For	CCCTTTCAACGTGAACGACT
	Rev	TCTTCTTTAACGCGATGCGA
EBF1	For	ATTAGTGGCCCGTTTGTTGT
	Rev	CGCTTAGAAACACAAGCTGC
EIN3/EIL1	For	TGCTTGCCTTTACCGAAGTT
	Rev	TGTTGAGGGAACACAACTGG
SlERF_C_2	For	GGAAGTTTCCTCCTCCAACC
	Rev	TGAGACGTGACCTCTTCGAT
CHI9	For	TGAGGCTTTCTGAATTCACTACT
	Rev	CCTGTGAACCACATTGCTCT
CHI3	For	CGTTGCACTGTCTTGTCTCT
	Rev	AATTCCCGCGTTACAATGGA
CHI17	For	CACGATGTTATCACAGGGCA
	Rev	CCAATCCGATCCTCCACTTG

## Sheet: C
The primers used for relative DNA content detection
Gene	Primer	Primer sequence (5'-3')
Solyc09g005050.1.1	For	GACTCGAGCTTGACTTCTTT
	Rev	GCGACTCTACAAGTTGTCTT
GGP	For	GTTTTGGTGGATTGGAACAG
	Rev	CAAGACCATGTGTCCACTAA
psbC	For	TGTCTCTCCTAGAAGTTGGT
	Rev	CATTGGATCTCCTGTCTCAT
psbA	For	TGATATGAGACAGGAGATCCA
	Rev	TTTGCCCAATCTGCTATCC
