# Supplementary material for: Deciphering Precise Gene Transcriptional Expression Using gwINTACT in Tomato
Source: Frontiers journal article supplement (doi:10.3389/fpls.2022.852206), 2022-04-14
Supplement: Data_Sheet_1.zip [file Supplentary TableS2.xlsx]

## Sheet: Sheet1
Differential expression of biotin metabolism crucial genes in GW2 lines compared with WT
gene_id	gene_name	transcript_id	GO	KEGG	KO_ENTRY	EC	Description	trans_type	FPKM.GW_1	FPKM.GW_2	FPKM.GW_3	FPKM.WT_1	FPKM.WT_2	FPKM.WT_3	fc	log2(fc)	pval	qval	regulation	significant
Solyc06g034150.3	Solyc06g034150.3	Solyc06g034150.3.1	GO:0005739(mitochondrion);GO:0005777(peroxisome);GO:0005829(cytosol);GO:0008483(transaminase activity);GO:0008710(8-amino-7-oxononanoate synthase activity);GO:0009058(biosynthetic process);GO:0009102(biotin biosynthetic process);GO:0030170(pyridoxal phosphate binding)	00780(Biotin metabolism)	K00652	EC:2.3.1.47	PREDICTED: 8-amino-7-oxononanoate synthase isoform X1 [Solanum lycopersicum]	NA	4.8088	5.24047	6.20097	4.55066	5.12663	5.64217	1.06076	0.0850952	0.566897	0.763581	up	no
Solyc07g006810.3	Solyc07g006810.3	Solyc07g006810.3.1	GO:0004015(adenosylmethionine-8-amino-7-oxononanoate transaminase activity);GO:0004141(dethiobiotin synthase activity);GO:0005739(mitochondrion);GO:0009102(biotin biosynthetic process);GO:0030170(pyridoxal phosphate binding);GO:0042802(identical protein binding)	00780(Biotin metabolism)	K19562	EC:6.3.3.3;EC:2.6.1.62	PREDICTED: bifunctional dethiobiotin synthetase/7,8-diamino-pelargonic acid aminotransferase, mitochondrial [Solanum lycopersicum]	NA	5.05825	5.27605	5.32703	3.92582	3.16408	4.14224	1.39433	0.479574	0.297049	0.532562	up	no
Solyc06g073470.3	Solyc06g073470.3	Solyc06g073470.3.1	GO:0004076(biotin synthase activity);GO:0005739(mitochondrion);GO:0008270(zinc ion binding);GO:0009102(biotin biosynthetic process);GO:0051537(2 iron, 2 sulfur cluster binding);GO:0051539(4 iron, 4 sulfur cluster binding)	00780(Biotin metabolism)	K01012	EC:2.8.1.6	PREDICTED: biotin synthase [Solanum lycopersicum]	NA	21.6711	23.5791	24.7659	13.3834	18.0128	15.2066	1.5024	0.587269	0.120396	0.304039	up	no
Differential expression of biotin metabolism crucial genes in BGW lines compared with WT
Solyc06g034150.3	Solyc06g034150.3	Solyc06g034150.3.1	GO:0005739(mitochondrion);GO:0005777(peroxisome);GO:0005829(cytosol);GO:0008483(transaminase activity);GO:0008710(8-amino-7-oxononanoate synthase activity);GO:0009058(biosynthetic process);GO:0009102(biotin biosynthetic process);GO:0030170(pyridoxal phosphate binding)	00780(Biotin metabolism)	K00652	EC:2.3.1.47	PREDICTED: 8-amino-7-oxononanoate synthase isoform X1 [Solanum lycopersicum]	NA	3.72162	3.23419	4.64267	4.55066	5.12663	5.64217	0.757108	-0.40143	0.14747	0.657728	down	no
Solyc07g006810.3	Solyc07g006810.3	Solyc07g006810.3.1	GO:0004015(adenosylmethionine-8-amino-7-oxononanoate transaminase activity);GO:0004141(dethiobiotin synthase activity);GO:0005739(mitochondrion);GO:0009102(biotin biosynthetic process);GO:0030170(pyridoxal phosphate binding);GO:0042802(identical protein binding)	00780(Biotin metabolism)	K19562	EC:6.3.3.3;EC:2.6.1.62	PREDICTED: bifunctional dethiobiotin synthetase/7,8-diamino-pelargonic acid aminotransferase, mitochondrial [Solanum lycopersicum]	NA	3.5685	2.93294	4.3089	3.92582	3.16408	4.14224	0.962447	-0.0552216	0.542413	0.941754	down	no
Solyc06g073470.3	Solyc06g073470.3	Solyc06g073470.3.1	GO:0004076(biotin synthase activity);GO:0005739(mitochondrion);GO:0008270(zinc ion binding);GO:0009102(biotin biosynthetic process);GO:0051537(2 iron, 2 sulfur cluster binding);GO:0051539(4 iron, 4 sulfur cluster binding)	00780(Biotin metabolism)	K01012	EC:2.8.1.6	PREDICTED: biotin synthase [Solanum lycopersicum]	NA	14.4491	13.0428	14.4666	13.3834	18.0128	15.2066	0.900341	-0.151456	0.330838	0.847823	down	no
